# Supplementary material
Source: Springer Nature journal article supplement (https://www.springermedizin.de/resource/supplementary/12936_2008_540_MOESM1_ESM.pdf/9548240)

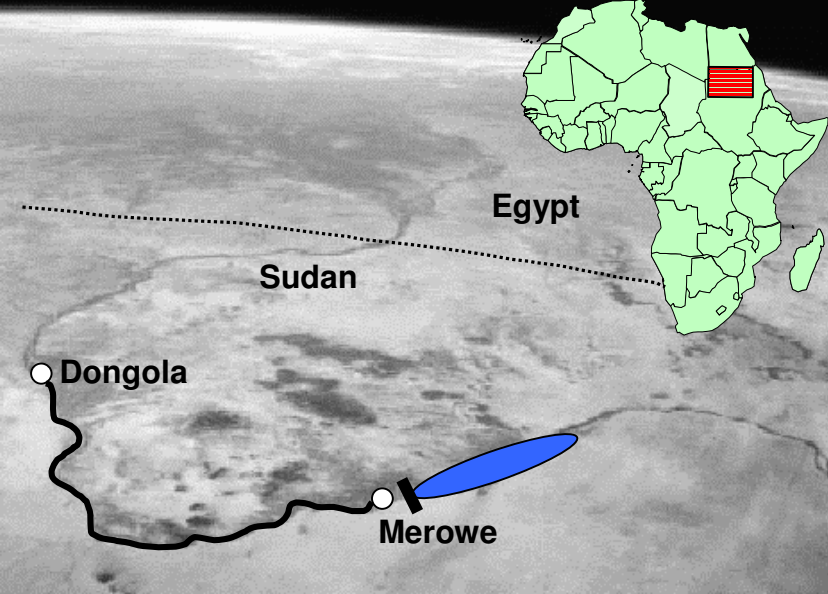

Egypt

Sudan

Dongola

Merowe

Supplement: MOESM1 [file 9548240]
